# Supplementary material
Source: PubMed Central journal article supplement (PMC2689002)
Supplement: 0803955106_0803955106SI.pdf [file 0803955106_0803955106SI.pdf]

# Supporting Information

O'Keeffe et al. 10.1073/pnas.0803955106

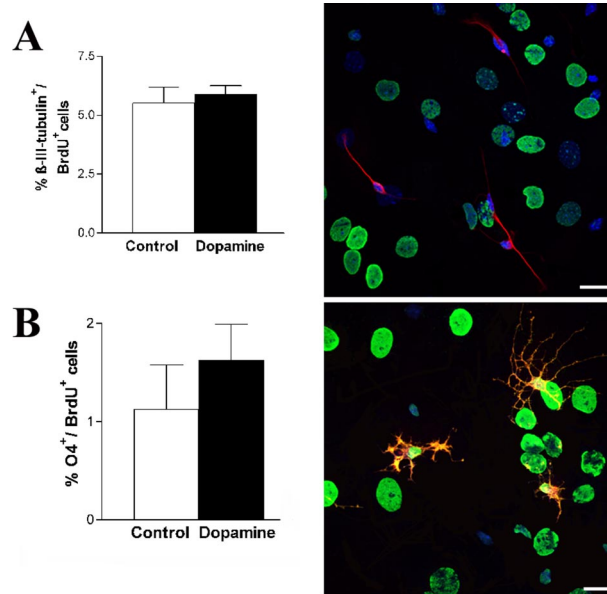

**Fig. S1.** Dopamine stimulation did not affect the number of newborn neurons or oligodendrocytes in vitro. To determine the effect of dopaminergic stimulation on the differentiation of adult NPCs, control and dopamine-treated cultures were pulsed with BrdU for 24 h and differentiated for 4 days. Phenotypic analysis of newly-generated cells immunostained for  $\beta$ -III-tubulin (A) and O4 (B) showed no difference between the dopamine-treated and untreated cultures. Nuclei are stained with Hoescht 33258. (Scale bar: 60  $\mu$ m.)

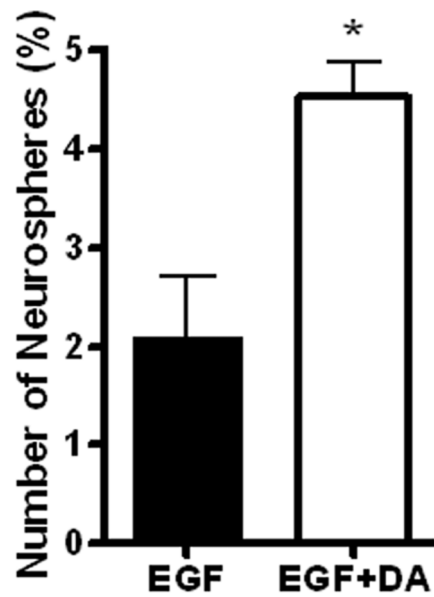

**Fig. S2.** Clonal efficiency is increased in the presence of dopamine. Adult SVZ NPCs were grown in EGF alone or in combination with dopamine for 7 days. They were then seeded as single cells per well for another 7 days after which the number of wells containing neurospheres was counted. Graph shows that there are a greater percentage of neural stem cells in the presence of dopamine. \*,  $P < 0.05$ .

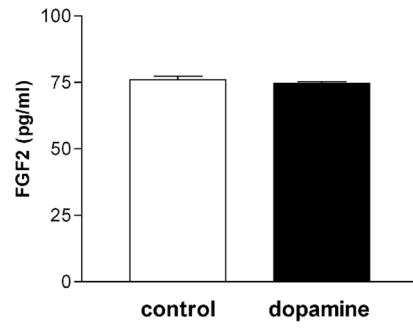

**Fig. S3.** Dopamine stimulation had no effect on the release of FGF2 from adult SVZ-derived NPCs. FGF2 release from adult SVZ-derived precursor cells after 24 h of treatment with dopamine compared with control samples by using an ELISA.

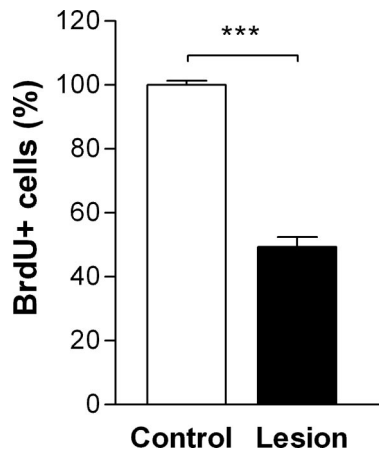

**Fig. S4.** Elimination of dopaminergic fibers via a 6-OHDA lesion significantly decreases proliferation in the olfactory bulb as a consequence of reduced local EGF production. Stereologically determined number of BrdU<sup>+</sup> cells in coronal sections of the olfactory bulb 21 d after the last BrdU injection. \*\*\*,  $P < 0.001$  lesion vs. control group.

**Table S1. The concentration of dopamine and its metabolite DOPAC in 6-OHDA lesioned animals treated with L-DOPA was significantly increased compared with untreated 6-OHDA lesioned animals**

| Animal                 | Dopamine             | DOPAC                 |
|------------------------|----------------------|-----------------------|
| 6-OHDA lesion          | 0.097169 ± 0.025451  | 0.033587 ± 0.012712   |
| 6-OHDA lesion + L-DOPA | 0.385473 ± 0.078219* | 0.206715 ± 0.034478** |

To determine whether L-DOPA is converted to dopamine in the 6-OHDA lesioned animal, we used the experimental paradigm outlined in Fig 4 but animals were killed 2 h after the last L-DOPA injection. The striatum was immediately removed and analyzed by HPLC for dopamine and DOPAC concentration. Tissue concentrations in all animals are expressed in pmol/mg striatal tissue (mean ± SEM) of 5 animals from each group.

\* $P < 0.05$  lesion versus lesion + L-DOPA.

\*\* $P < 0.01$  lesion versus lesion + L-DOPA.

**Table S2. Primary antibodies concentrations used, species antibodies were raised in, and suppliers**

| Antibody             | Species | Concentration used | Supplier                   |
|----------------------|---------|--------------------|----------------------------|
| BrdU                 | Sheep   | 1:1,000            | ABCAM                      |
|                      | Mouse   | 1:1,000            | Covance                    |
| GFAP                 | Rabbit  | 1:500              | DAKO                       |
| O4                   | Mouse   | 1:5                | S. Chandran, CBR Cambridge |
| $\beta$ -III-Tubulin | Mouse   | 1:500              | Covance                    |
| NeuN                 | Mouse   | 1:100              | Chemicon                   |
| EGFR                 | Rabbit  | Prediluted         | Chemicon                   |
|                      | Mouse   | 1:100              | R&D Systems                |
| TH                   | Mouse   | 1:100              | Chemicon                   |
| D2DR                 | Rabbit  | 1:200              | Santa Cruz                 |

Hoescht 33258 nuclear stain was used 1:5,000 (Sigma). Live staining for O4 was carried out before fixation by using anti-O4 for 1 h at 37 °C. For BrdU immunolabelling, sections were preincubated in 2 M HCl for 30 min followed by 3 washes with 0.1 M borate buffer, pH 8.5. Paraffin-embedded human sections were deparaffinized by heating them to 65 °C for 45 min and immersing them in xylene overnight. Sections were then rehydrated through a series of ethanol solutions before being immersed in citrate buffer (10 mM + 0.05% Tween 20, pH 6) and boiled in a microwave for 10 min.
